# Supplementary material for: Control Effects of Short-Term Heatwaves on a Holocyclic Aphid
Source: MDPI journal article supplement (doi:10.3390/insects15020100), 2024-02-01
Supplement: s1 [file s1]

**Table S1. Proportion (Mean  $\pm$  SE) of different morphs deposited by *A. glycines* on day 1, exposed to diurnal 35°C for 7 days begin at different developmental stages**

| Initial stage of aphid<br>exposed to diurnal 35°C | Proportion of <i>A. glycines</i> morphs in offspring (%) |                    |      |
|---------------------------------------------------|----------------------------------------------------------|--------------------|------|
|                                                   | Virginoparae                                             | Gynoparae          | Male |
| 1st–stadium                                       | 67.43 $\pm$ 0.09 a                                       | 32.57 $\pm$ 0.09 a | 0    |
| 2nd–stadium                                       | 75.66 $\pm$ 0.15 a                                       | 24.34 $\pm$ 0.15 a | 0    |
| 3rd–stadium                                       | 74.95 $\pm$ 0.06 a                                       | 25.05 $\pm$ 0.06 a | 0    |
| 4th–stadium                                       | 82.66 $\pm$ 0.06 a                                       | 17.34 $\pm$ 0.06 a | 0    |
| Adult stage                                       | 86.56 $\pm$ 0.02 a                                       | 13.44 $\pm$ 0.02 a | 0    |
| Aphids reared at constant<br>20°C (CK)            | 84.33 $\pm$ 0.01 a                                       | 15.67 $\pm$ 0.01 a | 0    |

Means within a column followed by the same letter do not differ significantly (HSD test,  $P < 0.05$ ).

**Table S2. Proportion (Mean  $\pm$  SE) of different morphs deposited by *A. glycines* on day 7, which were exposed to diurnal 35°C for seven days begin at different developmental stages**

| Initial stage of aphid<br>exposed to diurnal 35°C | Proportion of <i>A. glycines</i> morphs in offspring (%) |                    |      |
|---------------------------------------------------|----------------------------------------------------------|--------------------|------|
|                                                   | Virginoparae                                             | Gynoparae          | Male |
| 1st - stadium                                     | 19.29 $\pm$ 0.05 a                                       | 80.71 $\pm$ 0.05 a | 0    |
| 2nd - stadium                                     | 28.61 $\pm$ 0.08 a                                       | 71.39 $\pm$ 0.08 a | 0    |
| 3rd - stadium                                     | 26.17 $\pm$ 0.06 a                                       | 73.83 $\pm$ 0.06 a | 0    |
| 4th - stadium                                     | 27.52 $\pm$ 0.06 a                                       | 72.48 $\pm$ 0.06 a | 0    |
| Adult stage                                       | 23.30 $\pm$ 0.07 a                                       | 76.70 $\pm$ 0.07 a | 0    |
| Aphid reared at constant                          | 21.77 $\pm$ 0.02 a                                       | 78.23 $\pm$ 0.02 a | 0    |

Means within a column followed by same letter do not differ significantly (HSD test,  $P < 0.05$ ).

**Table S3. Proportion (Mean  $\pm$  SE) of different morphs deposited by *A. glycines* on day 13, which were exposed to diurnal 35°C for seven days begin at different developmental stages**

| Initial stage of aphid exposed to diurnal 35°C | Proportion of <i>A. glycines</i> morphs in offspring (%) |                    |                    |
|------------------------------------------------|----------------------------------------------------------|--------------------|--------------------|
|                                                | Virginoparae                                             | Gynoparae          | Male               |
| 1st – stadium                                  | 0                                                        | 33.97 $\pm$ 0.10 a | 66.03 $\pm$ 0.10 b |
| 2nd – stadium                                  | 0                                                        | 43.08 $\pm$ 0.17 a | 56.92 $\pm$ 0.17 b |
| 3rd – stadium                                  | 0                                                        | 39.75 $\pm$ 0.17 a | 60.25 $\pm$ 0.17 b |
| 4th – stadium                                  | 0                                                        | 67.50 $\pm$ 0.14 a | 32.50 $\pm$ 0.14 b |
| Adult stage                                    | 0                                                        | 75.71 $\pm$ 0.03 a | 24.29 $\pm$ 0.03 b |
| Aphid reared at constant 20°C (CK)             | 0                                                        | 0 b                | 100 a              |

Means within a column followed by same letter do not differ significantly (HSD test,  $P < 0.05$ )
